# Supplementary material for: Identification of an Immunogenic Broadly Inhibitory Surface Epitope of the Plasmodium vivax Duffy Binding Protein Ligand Domain
Source: PubMed Central journal article supplement (PMC6520440; doi:10.1128/msphere.00194-19), 2019-05-15
Supplement: mSphere.00194-19-st001.pdf [file mSphere.00194-19-st001.pdf]

| DBPII Allele | Accession # | Residue Position |     |     |     |     |     |     |     |     |     |     |     |     |     |     |     |     |     |     |     |     |     |     |     |
|--------------|-------------|------------------|-----|-----|-----|-----|-----|-----|-----|-----|-----|-----|-----|-----|-----|-----|-----|-----|-----|-----|-----|-----|-----|-----|-----|
|              |             | 308              | 319 | 333 | 369 | 371 | 375 | 384 | 385 | 386 | 387 | 388 | 389 | 390 | 391 | 392 | 393 | 417 | 424 | 437 | 447 | 454 | 992 | 503 | 505 |
| DBPII-Sal 1  | P22290.2    | R                | R   | L   | Y   | K   | N   | D   | E   | K   | A   | Q   | Q   | R   | R   | K   | Q   | N   | L   | W   | S   | Q   | K   | I   | V   |
| DBPII-7.18   | AAL79051.1  | S                | .   | .   | .   | .   | .   | G   | .   | Q   | .   | .   | .   | .   | .   | .   | .   | K   | I   | R   | .   | .   | .   | K   | .   |
| DBPII-AH     | AAY34130.1  | S                | .   | .   | .   | E   | .   | G   | .   | Q   | .   | .   | .   | .   | .   | .   | .   | K   | I   | R   | .   | .   | .   | K   | .   |
| DBPII-P      | AAL79073.1  | S                | .   | F   | .   | .   | D   | G   | K   | N   | .   | .   | .   | H   | .   | .   | .   | K   | I   | .   | .   | .   | .   | K   | .   |
